# Supplementary material
Source: PubMed Central journal article supplement (PMC8281331)
Supplement: NIHMS1716725-supplement-Electronic_Supplementary_Material.pdf [file NIHMS1716725-supplement-Electronic_Supplementary_Material.pdf]

**Definition and Analysis of Textbook Outcome: A Novel Quality Measure in Kidney Transplantation**

Samantha E. Halpern BA<sup>1</sup>, Dimitrios Moris MD, MSc, PhD<sup>1</sup>, Brian I. Shaw MD<sup>1</sup>, Samuel J. Kesseli MD<sup>1</sup>,  
Mariya L. Samoylova MD, MAS<sup>1</sup>, Miriam Manook MD<sup>1</sup>, Robin Schmitz MD<sup>1</sup>, Bradley H. Collins MD<sup>1</sup>, Scott  
L. Sanoff MD<sup>2</sup>, Kadiyala V. Ravindra MBBS<sup>1</sup>, Debra L. Sudan MD<sup>1</sup>, Stuart J. Knechtle MD<sup>1</sup>, Matthew J. Ellis  
MD<sup>1,2</sup>, Lisa M. McElroy MD<sup>1</sup>, Andrew S. Barbas MD<sup>1</sup>

**Corresponding Author:**

Andrew S. Barbas, MD

Department of Surgery, Duke University Medical Center

E-mail: [andrew.barbas@duke.edu](mailto:andrew.barbas@duke.edu)

| <b>Table S1. Characteristics of recipients and donors included in training and validation datasets.</b>                               |                                 |                                   |                |
|---------------------------------------------------------------------------------------------------------------------------------------|---------------------------------|-----------------------------------|----------------|
| <b>Characteristic<sup>a</sup></b>                                                                                                     | <b>Training Set<br/>N = 373</b> | <b>Validation Set<br/>N = 183</b> | <b>P-value</b> |
| <b>Age (years)</b>                                                                                                                    | 54 (43-62)                      | 53 (44-61)                        | 0.3            |
| <b>Sex</b>                                                                                                                            |                                 |                                   | 0.5            |
| Female                                                                                                                                | 164 (44%)                       | 75 (41%)                          |                |
| Male                                                                                                                                  | 209 (56%)                       | 108 (59%)                         |                |
| <b>Race</b>                                                                                                                           |                                 |                                   | 0.8            |
| Caucasian/White                                                                                                                       | 159 (43%)                       | 80 (44%)                          |                |
| Non-White                                                                                                                             | 214 (57%)                       | 103 (56%)                         |                |
| <b>Ethnicity (Hispanic)</b>                                                                                                           | 10 (3%)                         | 8 (4%)                            | 0.3            |
| <b>Panel reactive antibody (%)</b>                                                                                                    |                                 |                                   |                |
| Class I                                                                                                                               | 0 (0-13)                        | 0 (0-12)                          | 0.7            |
| Class II                                                                                                                              | 0 (0-0)                         | 0 (0-0)                           | 0.3            |
| <b>Etiology of kidney disease</b>                                                                                                     |                                 |                                   | 0.9            |
| Type 2 diabetes mellitus                                                                                                              | 90 (24%)                        | 40 (22%)                          |                |
| Hypertensive nephrosclerosis                                                                                                          | 66 (18%)                        | 32 (18%)                          |                |
| Polycystic kidney disease                                                                                                             | 38 (10%)                        | 15 (8%)                           |                |
| Focal segmental glomerulosclerosis                                                                                                    | 36 (10%)                        | 17 (9%)                           |                |
| IgA nephropathy                                                                                                                       | 21 (6%)                         | 12 (7%)                           |                |
| Calcineurin inhibitor nephrotoxicity                                                                                                  | 14 (4%)                         | 11 (6%)                           |                |
| Systemic lupus erythematosus                                                                                                          | 12 (3%)                         | 9 (5%)                            |                |
| Other                                                                                                                                 | 96 (26%)                        | 47 (26%)                          |                |
| <b>History of prior transplant</b>                                                                                                    | 59 (16%)                        | 24 (13%)                          | 0.4            |
| <b>Donor type</b>                                                                                                                     |                                 |                                   | 0.7            |
| Donation after brain death donor                                                                                                      | 189 (51%)                       | 98 (54%)                          |                |
| Donation after circulatory death donor                                                                                                | 75 (20%)                        | 32 (18%)                          |                |
| Living donor                                                                                                                          | 109 (29%)                       | 53 (29%)                          |                |
| <b>Human leukocyte antigen mismatches</b>                                                                                             | 4 (3-5)                         | 4 (3-5)                           | 0.8            |
| <sup>a</sup> Presented as median (interquartile range) for continuous variables and frequency (proportion) for categorical variables. |                                 |                                   |                |

| <b>Table S2. Operative characteristics among living donor kidney transplant recipients only, stratified by achievement of a textbook outcome (TO).</b> |                                     |                                   |                |
|--------------------------------------------------------------------------------------------------------------------------------------------------------|-------------------------------------|-----------------------------------|----------------|
| <b>Characteristic<sup>a</sup></b>                                                                                                                      | <b>Achieved TO<br/>N = 89 (55%)</b> | <b>Failed TO<br/>N = 74 (45%)</b> | <b>P-value</b> |
| <b>Cold ischemic time (minutes)</b>                                                                                                                    | 78 (61-118)                         | 92 (66-127)                       | 0.2            |
| <b>Warm ischemic time (minutes)</b>                                                                                                                    | 27 (23-31)                          | 28 (24-32)                        | 0.4            |
| <b>Total ischemic time (minutes)</b>                                                                                                                   | 105 (87-144)                        | 119 (92-156)                      | 0.2            |
| <b>Estimated blood loss (mL)</b>                                                                                                                       | 100 (100-200)                       | 100 (100-200)                     | >0.9           |
| <b>Transfusion requirement (units)</b>                                                                                                                 |                                     |                                   |                |
| Packed red blood cells                                                                                                                                 | 0 (0-0)                             | 0 (0-0)                           | 0.2            |
| <b>Machine perfusion used</b>                                                                                                                          | 0 (0%)                              | 0 (0%)                            |                |
| <b>Donor serologies</b>                                                                                                                                |                                     |                                   |                |
| Epstein-Barr virus positive                                                                                                                            | 83 (93%)                            | 69 (93%)                          | >0.9           |
| Cytomegalovirus positive                                                                                                                               | 46 (52%)                            | 31 (42%)                          | 0.2            |
| <b>Human leukocyte antigen mismatches</b>                                                                                                              | 3 (3-5)                             | 4 (3-5)                           | 0.06           |
| <b>Graft laterality</b>                                                                                                                                |                                     |                                   | >0.9           |
| Right                                                                                                                                                  | 4 (4%)                              | 4 (5%)                            |                |
| Left                                                                                                                                                   | 85 (96%)                            | 70 (95%)                          |                |
| Dual                                                                                                                                                   | 0 (0%)                              | 0 (0%)                            |                |
| <b>Ureteral stent used</b>                                                                                                                             | 52 (58%)                            | 46 (62%)                          | 0.5            |
| <b>Drain placed in the operating room</b>                                                                                                              | 14 (16%)                            | 19 (26%)                          | 0.12           |

<sup>a</sup> Presented as median (interquartile range) for continuous variables and frequency (proportion) for categorical variables.

**Table S3. Operative characteristics among deceased donor kidney transplant recipients only, stratified by achievement of a textbook outcome (TO).**

| <b>Characteristic<sup>a</sup></b>                                             | <b>Achieved TO<br/>N = 156 (40%)</b> | <b>Failed TO<br/>N = 238 (60%)</b> | <b>P-value</b>  |
|-------------------------------------------------------------------------------|--------------------------------------|------------------------------------|-----------------|
| <b>Cold ischemic time (minutes)</b>                                           |                                      |                                    |                 |
| All kidneys                                                                   | 1191 (924-1528)                      | 1214 (956-1566)                    | 0.3             |
| Non-pumped kidneys only                                                       | 834 (616-1119)                       | 1002 (689-1205)                    | 0.2             |
| <b>Warm ischemic time (minutes)</b>                                           | 28 (23-33)                           | 30 (24-34)                         | 0.12            |
| Missing                                                                       | 0 (0%)                               | 1 (0.4%)                           |                 |
| <b>Total ischemic time (minutes)</b>                                          | 1218 (947-1557)                      | 1244 (985-1599)                    | 0.3             |
| Missing                                                                       | 0 (0%)                               | 1 (0.4%)                           |                 |
| <b>Estimated blood loss (mL)</b>                                              | 100 (100-200)                        | 150 (100-200)                      | <b>&lt;0.01</b> |
| Missing                                                                       | 1 (0.6%)                             | 3 (1.3%)                           |                 |
| <b>Transfusion requirement (units)</b>                                        |                                      |                                    |                 |
| Packed red blood cells                                                        | 0 (0-0)                              | 0 (0-0)                            | 0.4             |
| Missing                                                                       | 0 (0%)                               | 1 (0.4%)                           |                 |
| Fresh frozen plasma                                                           | 0 (0-0)                              | 0 (0-0)                            | 0.3             |
| Missing                                                                       | 0 (0%)                               | 1 (0.4%)                           |                 |
| <b>Machine perfusion used</b>                                                 | 127 (81%)                            | 199 (84%)                          | 0.6             |
| <b>US Public Health Service increased risk for disease transmission donor</b> | 63 (40%)                             | 70 (29%)                           | <b>0.02</b>     |
| <b>Extended criteria donor</b>                                                | 19 (12%)                             | 36 (15%)                           | 0.4             |
| Missing                                                                       | 1 (0.6%)                             | 0 (0%)                             |                 |
| <b>Donor serologies</b>                                                       |                                      |                                    |                 |
| Epstein-Barr virus positive                                                   | 152 (97%)                            | 228 (96%)                          | 0.8             |
| Missing                                                                       | 0 (0%)                               | 2 (0.8%)                           |                 |
| Cytomegalovirus positive                                                      | 95 (61%)                             | 154 (65%)                          | 0.4             |
| <b>Kidney Donor Profile Index (%)</b>                                         | 48 (26-66)                           | 56 (34-71)                         | <b>0.048</b>    |
| Missing                                                                       | 1 (0.6%)                             | 0 (0%)                             |                 |
| <b>Human leukocyte antigen mismatches</b>                                     | 4 (3-5)                              | 4 (4-5)                            | 0.051           |
| Missing                                                                       | 1 (0.6%)                             | 0 (0%)                             |                 |
| <b>Graft laterality</b>                                                       |                                      |                                    | 0.5             |
| Right                                                                         | 79 (51%)                             | 130 (55%)                          |                 |
| Left                                                                          | 75 (48%)                             | 103 (43%)                          |                 |
| Dual                                                                          | 2 (1%)                               | 5 (2%)                             |                 |
| <b>Ureteral stent used</b>                                                    | 95 (61%)                             | 178 (75%)                          | <b>&lt;0.01</b> |
| <b>Drain placed in the operating room</b>                                     | 32 (21%)                             | 65 (27%)                           | 0.13            |

<sup>a</sup> Presented as median (interquartile range) for continuous variables and frequency (proportion) for categorical variables.

| <b>Table S4. Achievement of textbook outcome (TO) by donor organ type.<sup>a</sup></b> |                |                            |                             |                  |
|----------------------------------------------------------------------------------------|----------------|----------------------------|-----------------------------|------------------|
| <b>Donor Type</b>                                                                      | <b>Total N</b> | <b>Achieved TO (N (%))</b> | <b>Post Hoc Comparisons</b> |                  |
|                                                                                        |                |                            | <b>Living Donor</b>         | <b>DBD Donor</b> |
| All donor types                                                                        | 557            | 245 (44%)                  |                             |                  |
| Living donor                                                                           | 163            | 89 (55%)                   |                             |                  |
| Deceased donor (DBD or DCD)                                                            | 394            | 156 (40%)                  |                             |                  |
| DBD                                                                                    | 287            | 121 (42%)                  | <b>0.011</b>                |                  |
| DCD                                                                                    | 107            | 35 (33%)                   | <b>&lt;0.01</b>             | 0.08             |

DBD, donation after brain death; DCD, donation after circulatory death.  
<sup>a</sup> ANOVA p-value for comparison of means between living, DBD, and DCD donors = 0.0012

| <b>Table S5. Financial Implications of textbook outcome (TO).</b> |                                      |                                    |                   |
|-------------------------------------------------------------------|--------------------------------------|------------------------------------|-------------------|
| <b>Financial Characteristic</b>                                   | <b>Achieved TO<br/>N = 243 (44%)</b> | <b>Failed TO<br/>N = 311 (56%)</b> | <b>P-value</b>    |
| <b>Total charge (\$), median (IQR)</b>                            | 257,587 (218,013-340,601)            | 311,204 (253,262-437,649)          | <b>&lt;0.0001</b> |
| <b>Transplant charge (\$), median (IQR)</b>                       | 182,964 (155,245-213,906)            | 213,604 (176,077-263,730)          | <b>&lt;0.0001</b> |

**Figure S1. Kaplan-Meier survival analysis of the entire patient cohort stratified by delayed graft function (DGF).** (a) Patient survival. (b) Graft survival. (c) Rejection-free survival.

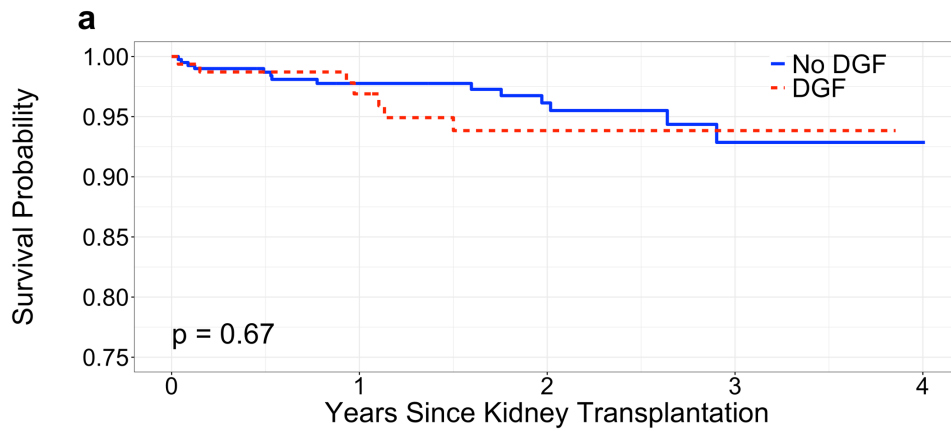

Number at risk

|        |     |     |     |    |   |
|--------|-----|-----|-----|----|---|
| No DGF | 400 | 261 | 155 | 56 | 1 |
| DGF    | 157 | 105 | 71  | 27 | 0 |

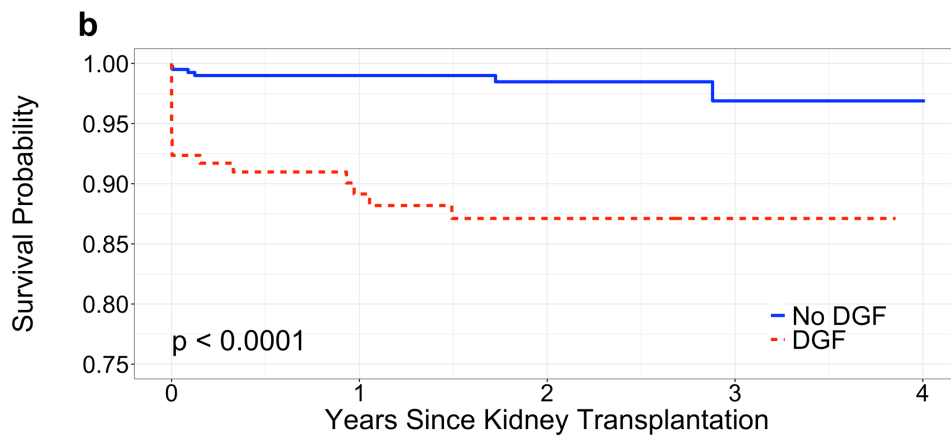

Number at risk

|        |     |     |     |    |   |
|--------|-----|-----|-----|----|---|
| No DGF | 400 | 261 | 154 | 54 | 1 |
| DGF    | 157 | 96  | 66  | 26 | 0 |

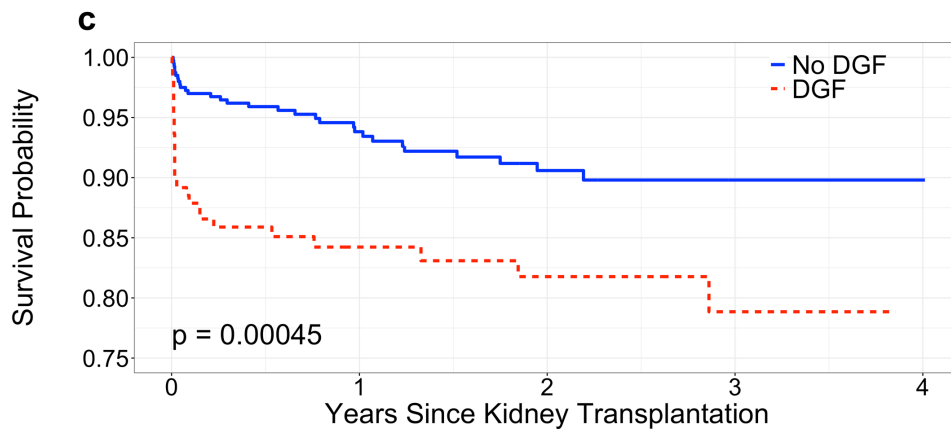

Number at risk

|        |     |     |     |    |   |
|--------|-----|-----|-----|----|---|
| No DGF | 400 | 244 | 141 | 48 | 1 |
| DGF    | 157 | 87  | 57  | 22 | 0 |

**Figure S2. Kaplan-Meier survival analysis of living donor kidney transplant recipients stratified by achievement of textbook outcome (TO). (a) Patient survival. (b) Graft survival. (c) Rejection-free survival.**

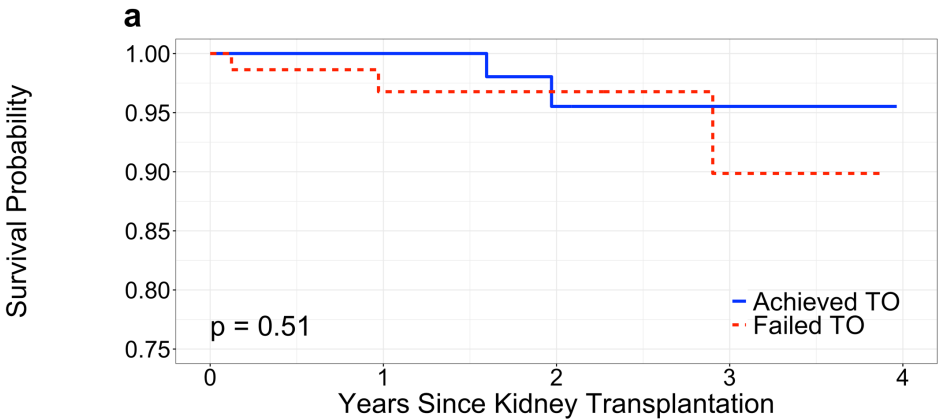

Number at risk

|             |    |    |    |    |   |
|-------------|----|----|----|----|---|
| Achieved TO | 89 | 64 | 37 | 14 | 0 |
| Failed TO   | 74 | 49 | 30 | 13 | 0 |

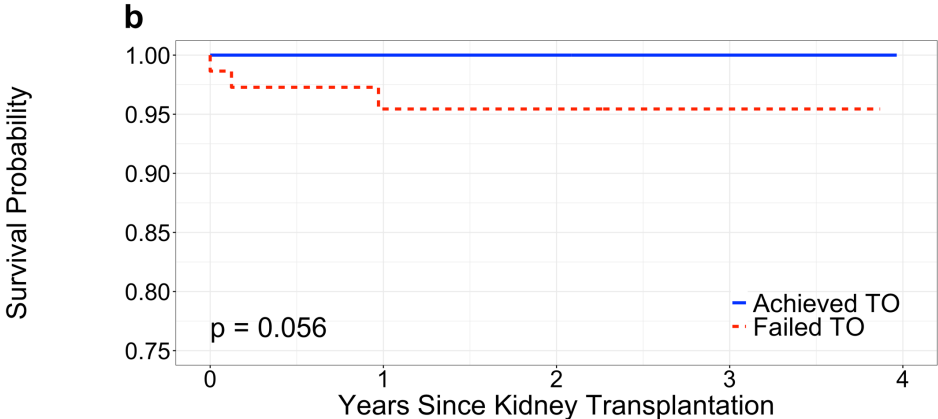

Number at risk

|             |    |    |    |    |   |
|-------------|----|----|----|----|---|
| Achieved TO | 89 | 64 | 37 | 14 | 0 |
| Failed TO   | 74 | 49 | 30 | 13 | 0 |

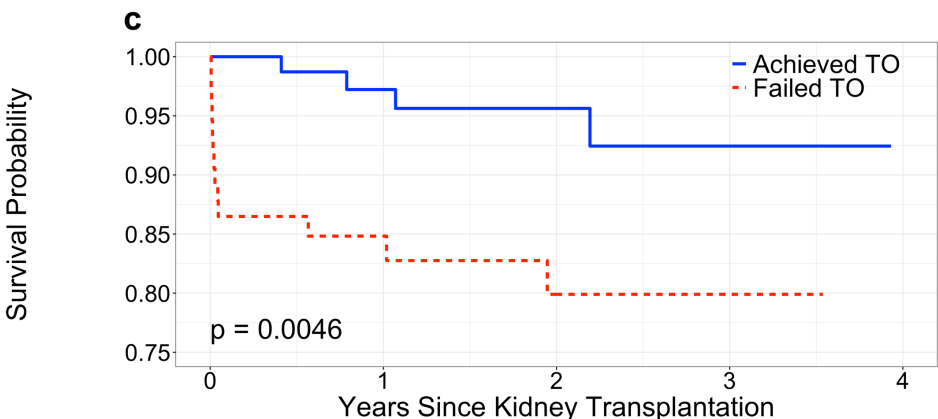

Number at risk

|             |    |    |    |    |   |
|-------------|----|----|----|----|---|
| Achieved TO | 89 | 62 | 36 | 12 | 0 |
| Failed TO   | 74 | 41 | 23 | 10 | 0 |



**Figure S3. Kaplan-Meier survival analysis of deceased donor kidney transplant recipients stratified by achievement of textbook outcome (TO). (a) Patient survival. (b) Graft survival. (c) Rejection-free survival.**

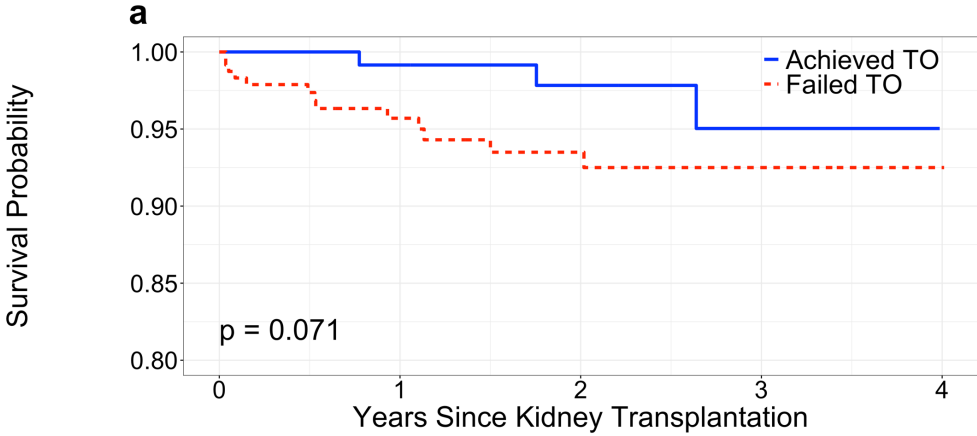

Number at risk

|             |     |     |    |    |   |
|-------------|-----|-----|----|----|---|
| Achieved TO | 156 | 106 | 64 | 23 | 0 |
| Failed TO   | 238 | 147 | 95 | 33 | 1 |

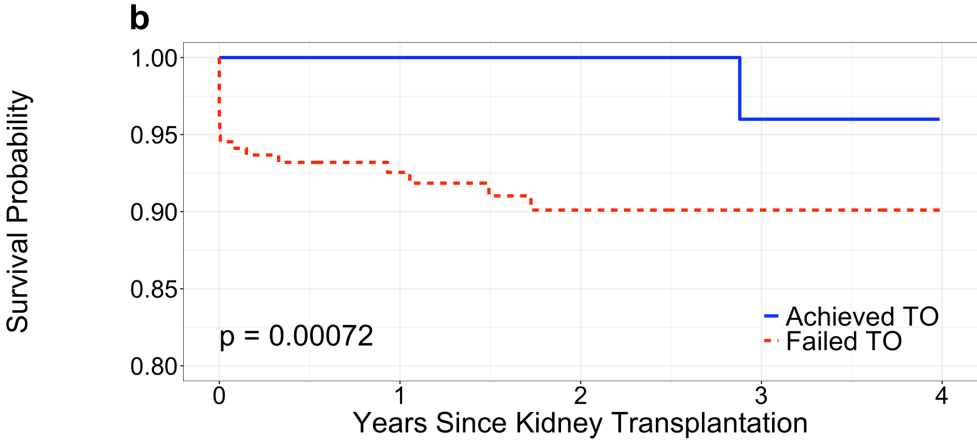

Number at risk

|             |     |     |    |    |   |
|-------------|-----|-----|----|----|---|
| Achieved TO | 156 | 106 | 64 | 22 | 0 |
| Failed TO   | 238 | 138 | 89 | 31 | 1 |

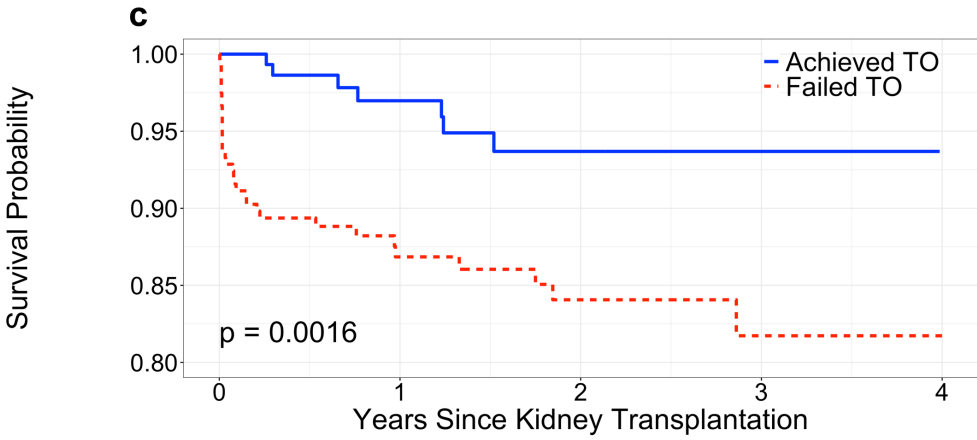

Number at risk

|             |     |     |    |    |   |
|-------------|-----|-----|----|----|---|
| Achieved TO | 156 | 102 | 59 | 21 | 0 |
| Failed TO   | 238 | 126 | 80 | 27 | 1 |
